# Supplementary material for: Expression of long non‐coding RNA ENSG00000226738 (LncKLHDC7B) is enriched in the immunomodulatory triple‐negative breast cancer subtype and its alteration promotes cell migration, invasion, and resistance to cell death
Source: PubMed Central journal article supplement (PMC6441920; doi:10.1002/1878-0261.12446), 2019-02-09
Supplement: MOL2-13-909-s007.pdf [file MOL2-13-909-s007.pdf]

# Supplementary Information

The file contains

- Supplementary information figure1-8

# Supplementary Information

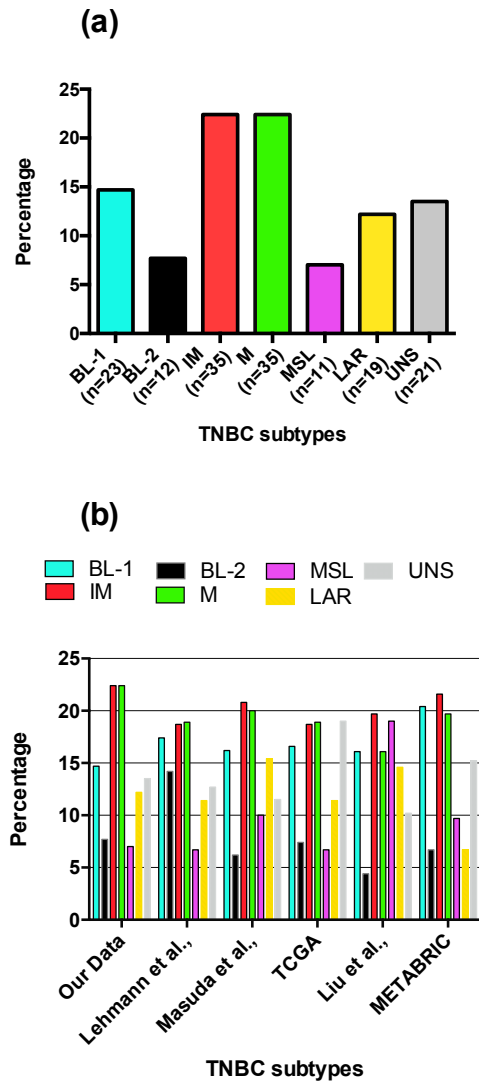

**Supplementary figure 1.** (a) Frequency of TNBC subtypes in this study and (b) other studies (Cancer Genome Atlas, 2012; Curtis et al., 2012; Lehmann et al., 2011; Liu et al., 2016; Masuda et al., 2013).

Color Key

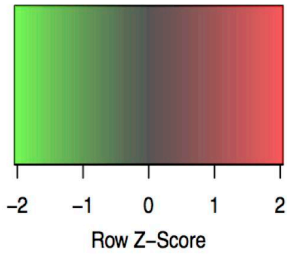

Gene ontology/Pathways TNBC subtypes

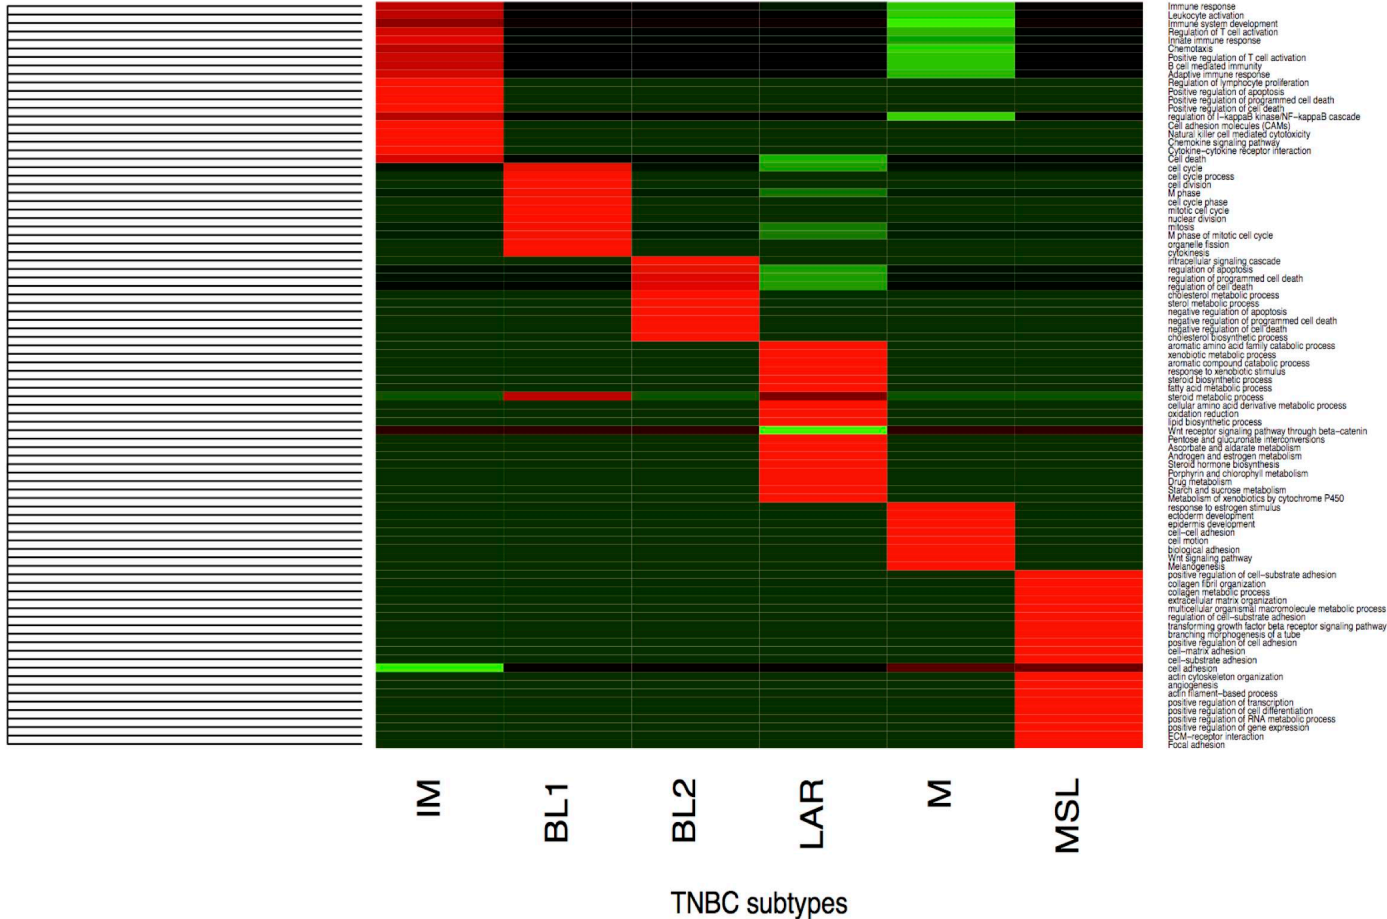

**Supplementary figure 2.** Gene ontology from FFPE TNBC samples in this study. Each subtype shows biological enrichment according to gene expression profile from DAVID analysis.

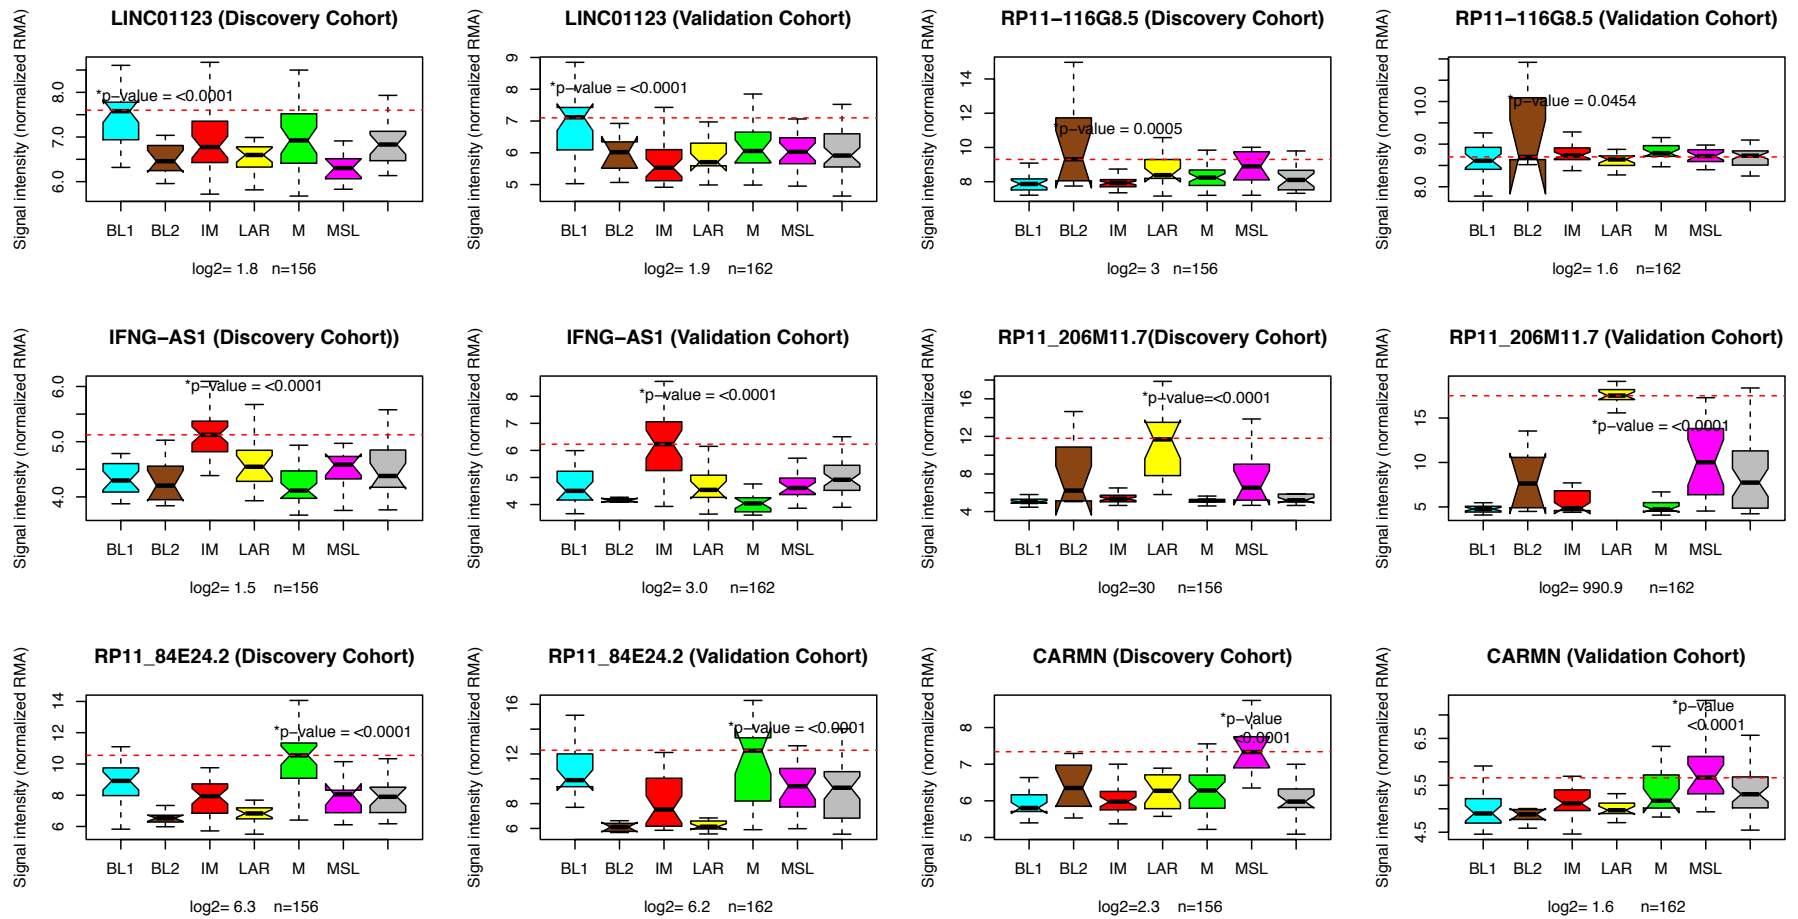

**Supplementary figure 3.** Independent validation of some LncRNAs in TNBC subtypes. The plot represent levels of normalized fluorescence intensity (RMA) of LncRNAs evaluated in our cohort (n=156) and in the validation cohort (n=160) (GEO: GSE76250). FC: fold change. The dotted line shows the mean expression. BL1: Basal-like 1, BL2: Basal-like 2, IM: immunomodulatory, M: mesenchymal, MSL: mesenchymal stem-like, LAR: luminal androgen receptor.

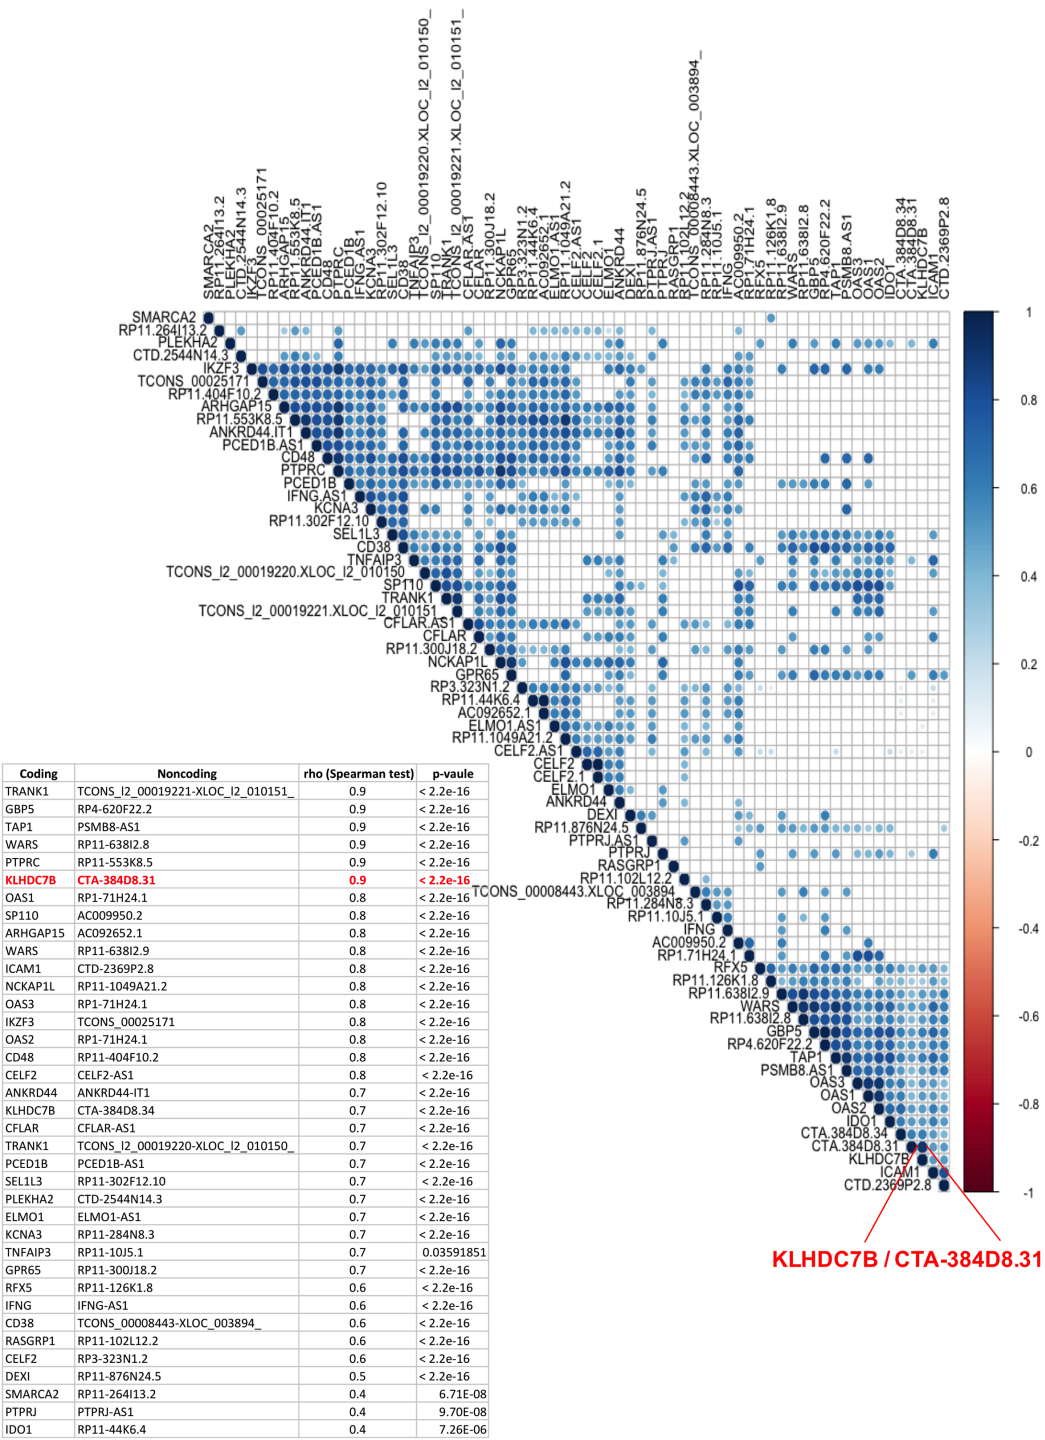

**KLHDC7B / CTA-384D8.31**

**Supplementary figure 4.** Correlation analysis of coding and non-coding genes co-expressed positively in the immunomodulatory phenotype. In the table shows the coding and long non-coding genes (adjacent or overlapping) from IM subtype TNBC. Triangular heat map representing the correlation coefficients matrix of coding and non-coding genes co-expressed, the blue dots indicate the statistically significant positive correlations ( $p < 0.0001$ ), and blank squares indicate non-significant correlations.

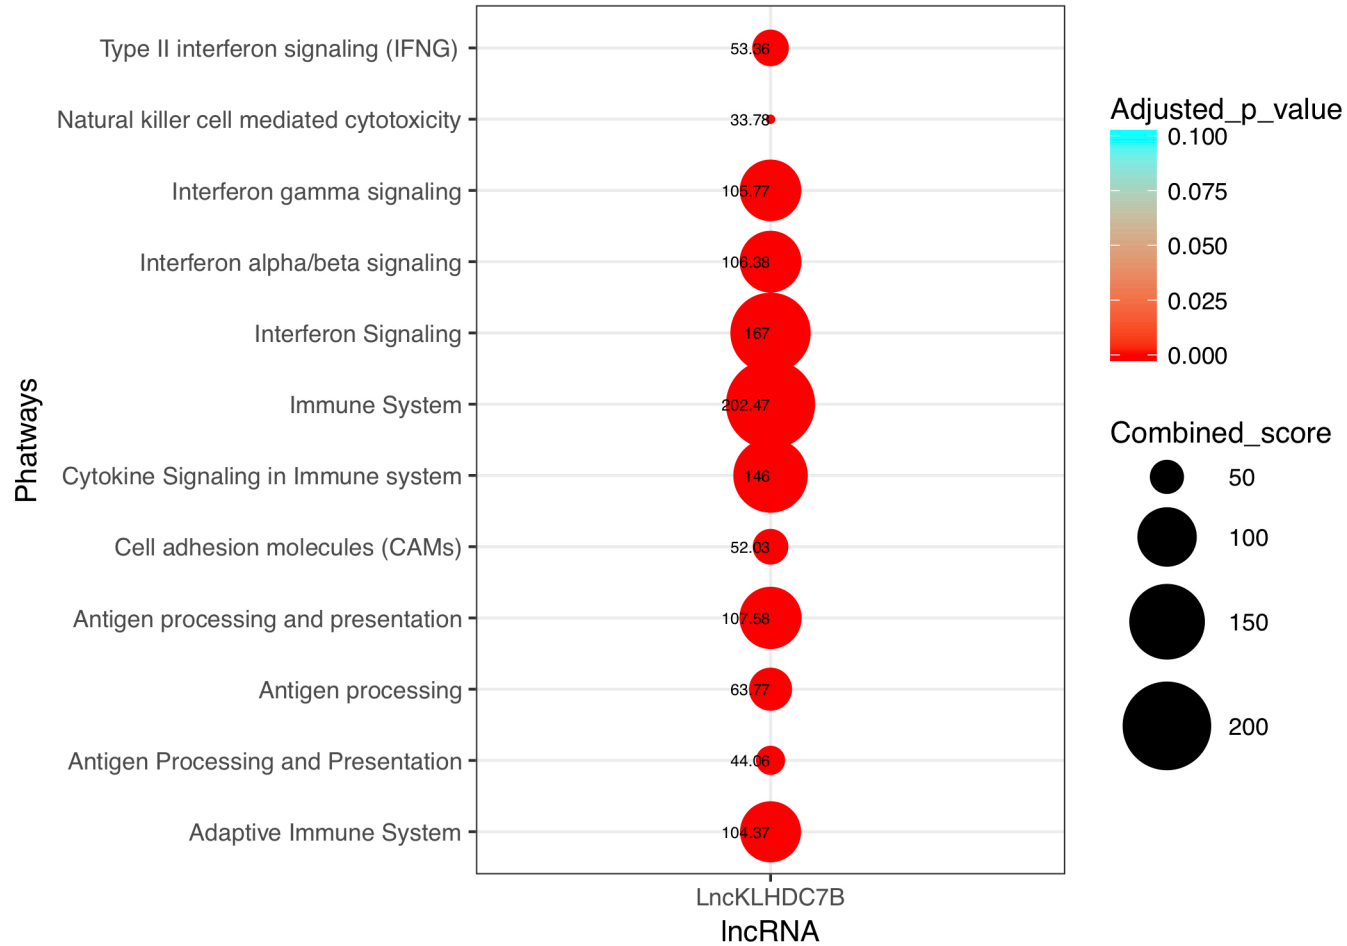

**Supplementary figure 5.** Guilt-by-association analysis. Bubble chart shows enrichment of biological pathways correlated by expression of LncKLHDC7B. Y-axis label represents pathways. Size and color of the bubble represents the Score each pathway and significance, respectively.

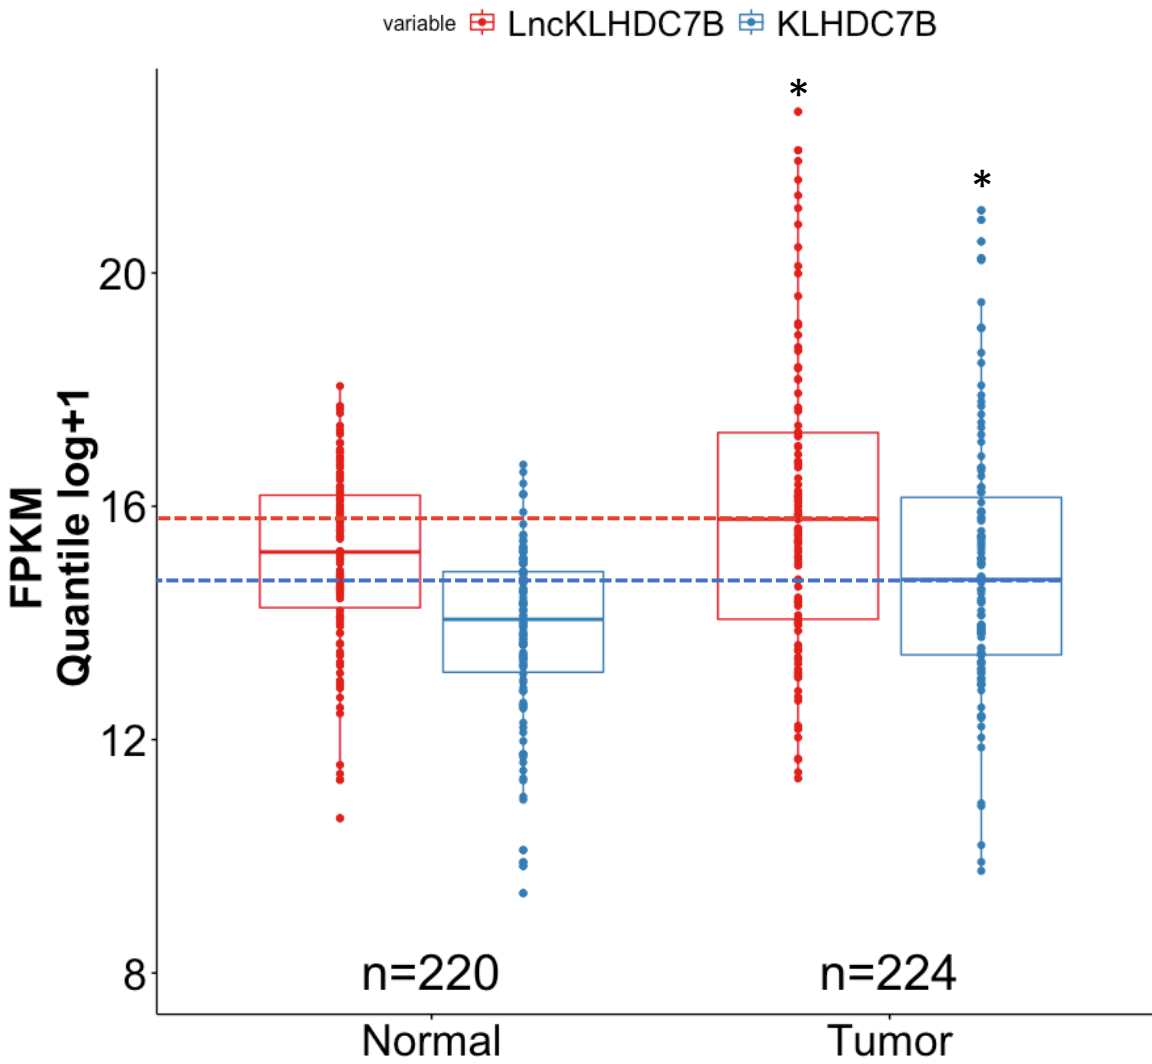

**Supplementary figure 6. Up-modulation of LncKLHDC7B and KLHDC7B in tumor samples of breast cancer.** Expression of *LncKLHDC7B* and *KLHDC7B* in human normal adjacent and tumor tissues from TCGA data.

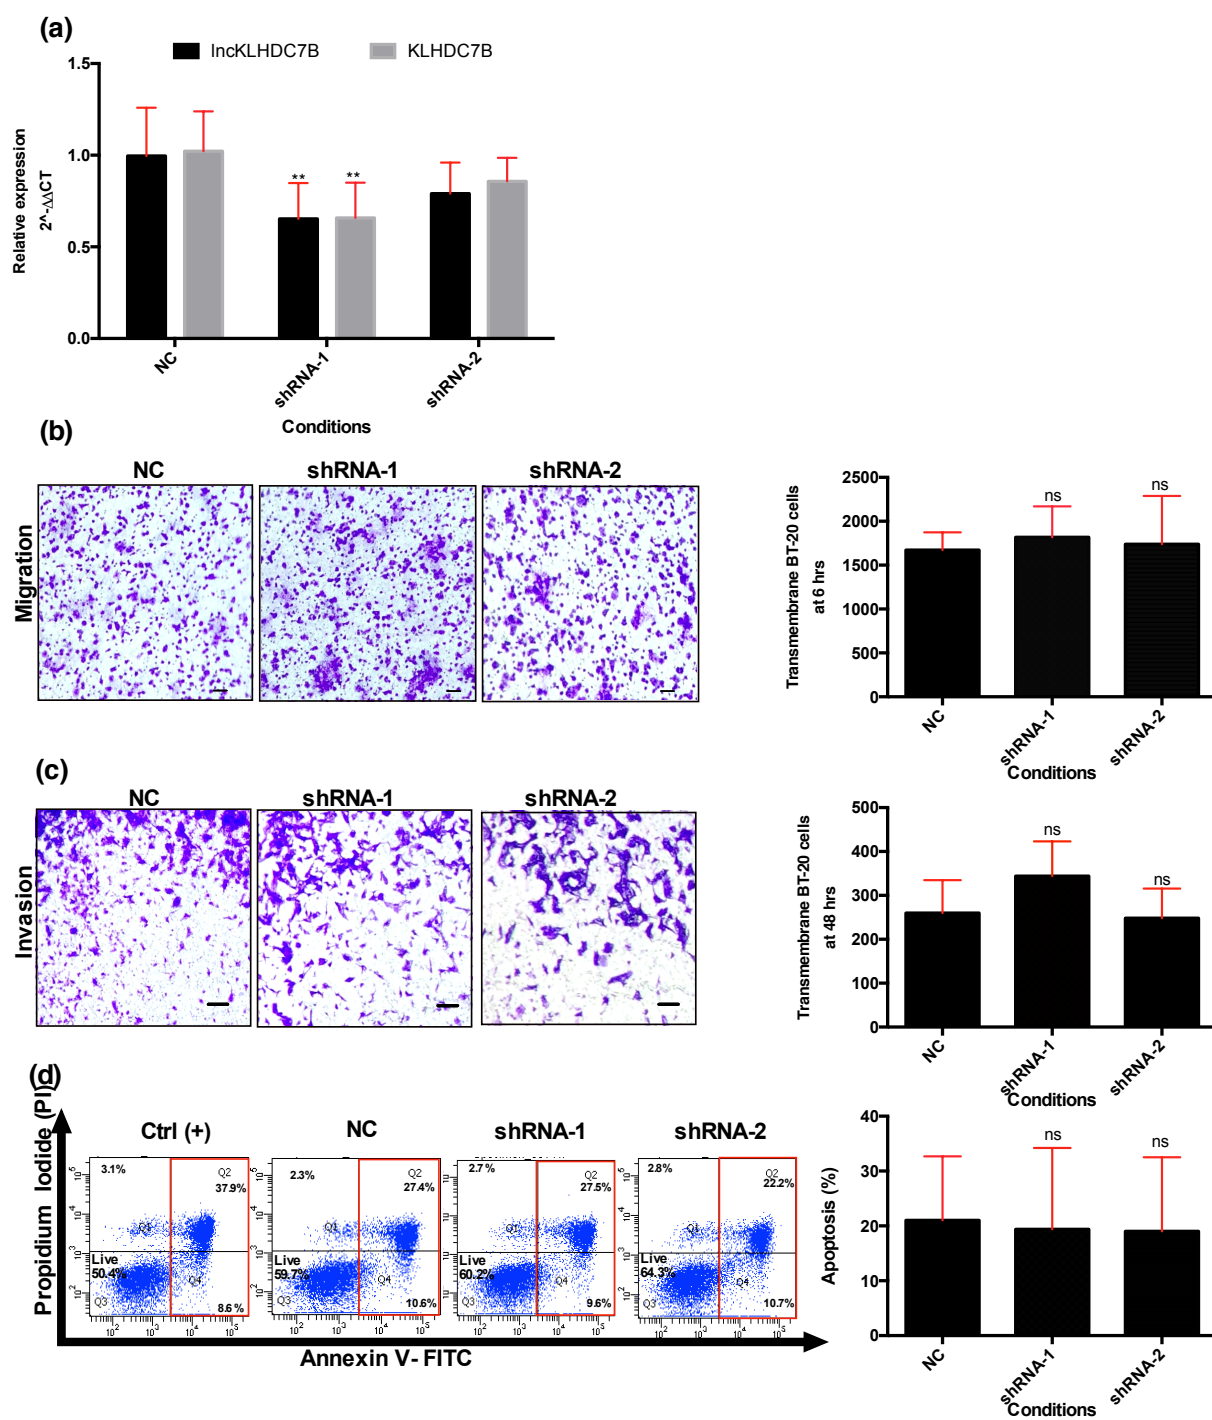

**Supplementary figure 7. Functional analysis by the silencing of *LncKLHDC7B* in BT-20 cell line.** (a) The expression of *LncKLHDC7B* and *KLHDC7B* in BT-20 cells transfected with NC or shRNA-1 or -2 versus *LncKLHDC7B* was determined by qRT-PCR. (b) Transwell migration and (c) invasion assay showed that *LncKLHDC7B* silencing increase the migration and invasion of BT-20. Representative images are shown on the left and its quantification on the right. Scale bar = 50 $\mu$ m. (d) Flow cytometric analysis of apoptosis (early and late) in BT-20 cell transfected with control and shRNAs-1 and -2 after Annexin-V/PI staining. All data are shown as the mean  $\pm$  SD of at least three independent experiments. Student's t-test was performed to determine significance, ns =  $p > 0.05$ , \* $p < 0.05$ , \*\* $p < 0.01$ , \*\*\* $p < 0.001$  of NC vs shRNAs.



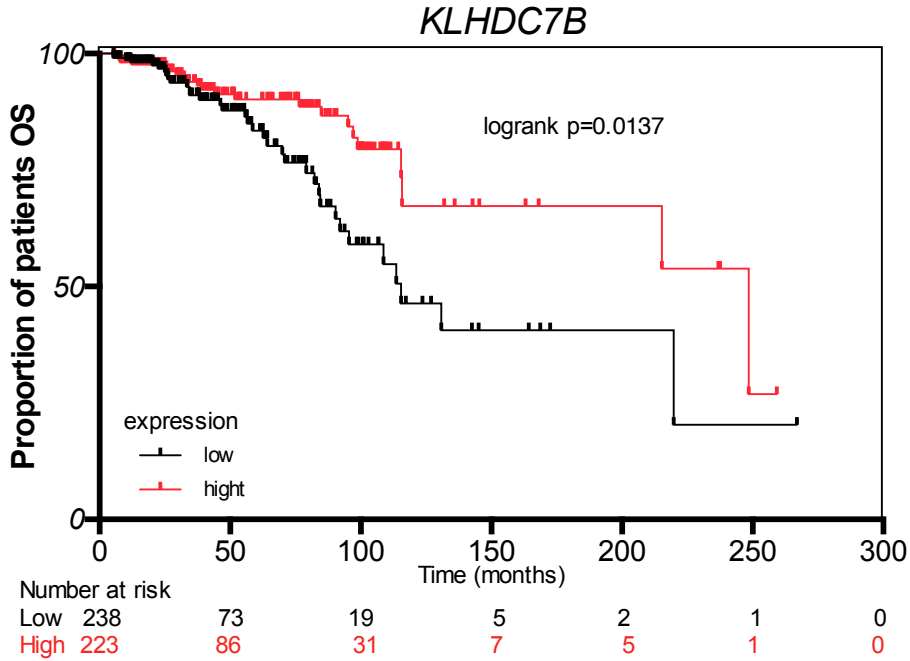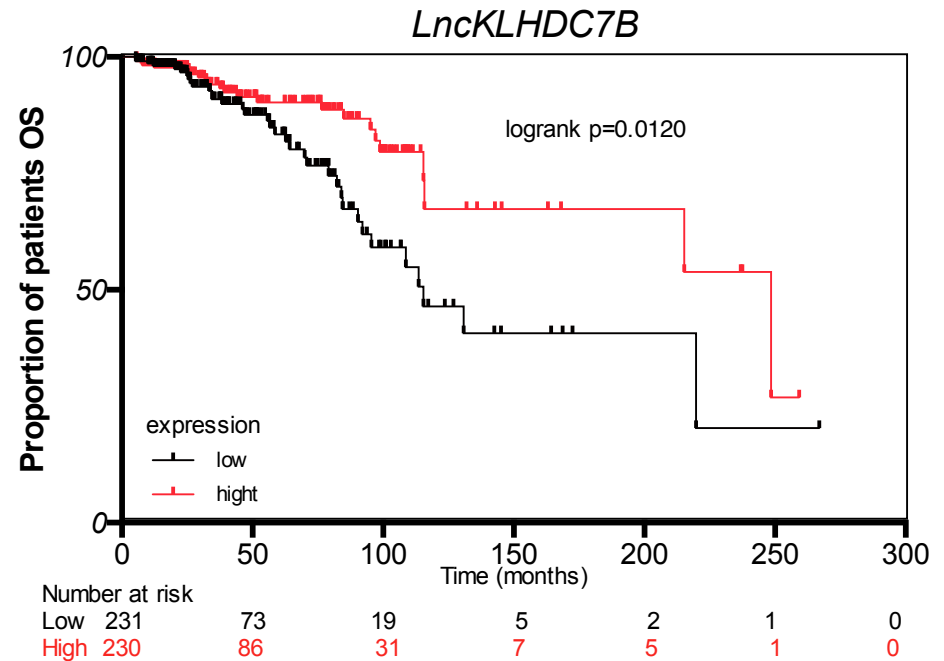

**Supplementary figure 8. Kaplan-Meier curve of overall survival (OS).** Kaplan-Meier analysis was analyzed according to *KLHDC7B* and *LncKLHDC7B* expression levels from TCGA BRCA data (Anaya, J., 2016. Li et al., 2015 ). *P* value was obtained using the log-rank test.

## References

Cancer Genome Atlas, N., 2012. Comprehensive molecular portraits of human breast tumours. *Nature* 490, 61-70.

Curtis, C., Shah, S.P., Chin, S.F., Turashvili, G., Rueda, O.M., Dunning, M.J., Speed, D., Lynch, A.G., Samarajiwa, S., Yuan, Y., Graf, S., Ha, G., Haffari, G., Bashashati, A., Russell, R., McKinney, S., Group, M., Langerod, A., Green, A., Provenzano, E., Wishart, G., Pinder, S., Watson, P., Markowitz, F., Murphy, L., Ellis, I., Purushotham, A., Borresen-Dale, A.L., Brenton, J.D., Tavare, S., Caldas, C., Aparicio, S., 2012. The genomic and transcriptomic architecture of 2,000 breast tumours reveals novel subgroups. *Nature* 486, 346-352.

Lehmann, B.D., Bauer, J.A., Chen, X., Sanders, M.E., Chakravarthy, A.B., Shyr, Y., Pietenpol, J.A., 2011. Identification of human triple-negative breast cancer subtypes and preclinical models for selection of targeted therapies. *J Clin Invest* 121, 2750-2767.

Liu, Y.R., Jiang, Y.Z., Xu, X.E., Yu, K.D., Jin, X., Hu, X., Zuo, W.J., Hao, S., Wu, J., Liu, G.Y., Di, G.H., Li, D.Q., He, X.H., Hu, W.G., Shao, Z.M., 2016. Comprehensive transcriptome analysis identifies novel molecular subtypes and subtype-specific RNAs of triple-negative breast cancer. *Breast Cancer Res* 18, 33.

Masuda, H., Baggerly, K.A., Wang, Y., Zhang, Y., Gonzalez-Angulo, A.M., Meric-Bernstam, F., Valero, V., Lehmann, B.D., Pietenpol, J.A., Hortobagyi, G.N., Symmans, W.F., Ueno, N.T., 2013. Differential response to neoadjuvant chemotherapy among 7 triple-negative breast cancer molecular subtypes. *Clin Cancer Res* 19, 5533-5540.

Anaya, J., 2016. OncoLnc: linking TCGA survival data to mRNAs, miRNAs, and lncRNAs. *PeerJ Computer Science* 2:e67, 2e:67 ed, PeerJ Computer Science.

Li, J., Han, L., Roebuck, P., Diao, L., Liu, L., Yuan, Y., Weinstein, J.N., Liang, H., 2015. TANRIC: An Interactive Open Platform to Explore the Function of lncRNAs in Cancer. *Cancer Res* 75, 3728-3737.
